## RESEARCH ARTICLE

# Analysis of lung cancer risk factors from medical records in Ethiopia using machine learning

Demeke Endalie<sup>1\*</sup>, Wondmagegn Taye Abebe<sup>2</sup>

**1** Faculty of Computing and Informatics, Jimma Institute of Technology, Jimma, Ethiopia, **2** Faculty of Civil and Environmental Engineering, Jimma Institute of Technology, Jimma, Ethiopia

\* [demeke.endalie@ju.edu.et](mailto:demeke.endalie@ju.edu.et)

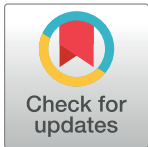

## Abstract

Cancer is a broad term that refers to a wide range of diseases that can affect any part of the human body. To minimize the number of cancer deaths and to prepare an appropriate health policy on cancer spread mitigation, scientifically supported knowledge of cancer causes is critical. As a result, in this study, we analyzed lung cancer risk factors that lead to a highly severe cancer case using a decision tree-based ranking algorithm. This feature relevance ranking algorithm computes the weight of each feature of the dataset by using split points to improve detection accuracy, and each risk factor is weighted based on the number of observations that occur for it on the decision tree. Coughing of blood, air pollution, and obesity are the most severe lung cancer risk factors out of nine, with a weight of 39%, 21%, and 14%, respectively. We also proposed a machine learning model that uses Extreme Gradient Boosting (XGBoost) to detect lung cancer severity levels in lung cancer patients. We used a dataset of 1000 lung cancer patients and 465 individuals free from lung cancer from Tikur Ambesa (Black Lion) Hospital in Addis Ababa, Ethiopia, to assess the performance of the proposed model. The proposed cancer severity level detection model achieved 98.9%, 99%, and 98.9% accuracy, precision, and recall, respectively, for the testing dataset. The findings can assist governments and non-governmental organizations in making lung cancer-related policy decisions.

## OPEN ACCESS

**Citation:** Endalie D, Abebe WT (2023) Analysis of lung cancer risk factors from medical records in Ethiopia using machine learning. PLOS Digit Health 2(7): e0000308. <https://doi.org/10.1371/journal.pdig.0000308>

**Editor:** Henry Horng-Shing Lu, National Yang Ming Chiao Tung University, TAIWAN

**Received:** February 28, 2023

**Accepted:** June 23, 2023

**Published:** July 19, 2023

**Copyright:** © 2023 Endalie, Abebe. This is an open access article distributed under the terms of the [Creative Commons Attribution License](https://creativecommons.org/licenses/by/4.0/), which permits unrestricted use, distribution, and reproduction in any medium, provided the original author and source are credited.

**Data Availability Statement:** This research work's data set and source code are publicly available online on GitHub (<https://github.com/demekeendalie/cancer>).

**Funding:** The authors received no specific funding for this work.

**Competing interests:** The authors have declared that no competing interests exist.

## Author summary

Lung cancer has become one of the leading causes of mortality in Ethiopia. Lung cancer risk factors vary from place to place since it depends on the people's socio-cultural activities. In this study, we examine lung cancer risk factors from the medical records of lung cancer patients in Addis Ababa, Ethiopia. The data contains the medical records of 872 women and 593 men. The key risk variables for lung cancer in the study area were identified using a decision tree. We discovered that coughing blood is one of the major risk factors for lung cancer, with a weight of 0.39. A feature importance of 0.39 indicates that the feature contributes 39% of the overall decision in the detection model. Furthermore, air pollution and obesity are the most important risk factors for lung cancer, with relevance

weights of 0.21 and 0.14, respectively. This implies that these risk factors are causing or indicating most lung cancer cases in the study area. These three factors account for 74% of lung cancer analysis in the study area. Furthermore, we use the XGBoost classifier to detect lung cancer severity levels from risk factors, and the experiment yields a significant detection result.

## 1. Introduction

Cancer is a complex and diverse disease; its occurrence patterns vary according to variances in underlying cancer risk factors, such as environmental and lifestyle factors [1]. According to studies, cancer is on the rise in economically transitional countries due to rapid population growth, higher life expectancy, the adoption of unhealthy lifestyles, and changes in reproductive patterns [2]. The prevalence of cancer in Ethiopia is rapidly increasing, with an annual estimate of 77,352 new cancer cases in 2022 [3]. The cancer burden was estimated using the Addis Ababa population-based cancer registry. As a result, breast cancer (31.5%) and cervix cancer (14.1%) are the two most prevalent cancers among females, whereas colorectal cancers (10.6%) and non-Hodgkin lymphomas (10.2%) are the most common malignancies among males [4].

Lung cancer is the leading cause of cancer death worldwide, killing 1.8 million people each year. Only 20% of lung cancer cases are reported in low- and middle-income countries. An estimated 1.5% of all Ethiopian cancers involve the lungs [5]. Several risk factors for lung cancer have been identified by research [6]. Some of Ethiopia's major lung cancer risk factors include smoking, alcohol use, passive smoking, air pollution, a family history of lung cancer (genetic risk), chest pain, and diet [7]. This study aimed to use a data mining algorithm to determine the lung cancer risk factor with the strongest relationship to its severity level and to build a model to predict the severity level from lung cancer risk factor records. Some of the works related to this study are listed below.

Authors in Ethiopia attempted to identify cancer symptoms and risk factors. For instance, the authors in [8] conducted a population-based face-to-face interview using a validated cancer awareness measure (CAM) method. A total of 600 adults (315 males and 285 females) were recruited utilizing a multistage sampling technique. One open-ended and ten closed-ended questions were used to test awareness of cancer. One open-ended and 12 closed-ended questions were used. The association between sociodemographic status and awareness of cancer signs, symptoms, and risk factors was investigated using logistic regression analysis. According to the closed questions responses, most respondents (80.7%) classified constant weariness as a cancer symptom and alcohol usage (82.5%) as a cancer risk.

The authors of [9] present a machine learning model for predicting factors for delayed BC diagnosis. In the study, four machine learning algorithms, including extreme gradient boosting (XGBoost), random forest (RF), neural networks (NNs), and logistic regression (LR), were used to examine the data of 630 women with confirmed BC. The most important factors for a delayed BC diagnosis were urban residency, breast disease history, other comorbidities, age at first childbirth, nulliparous ness, and being married. However, the significance of cancer risk factors is determined by their association with the severity degree [10].

The research of [11] considers 14 different possible risk factors for the two diseases ranging in importance from smoking and being overweight to drinking excessively hot drinks. Obesity has become a greater risk factor for Cancer and cardiovascular disease CVD in some areas,

and research findings on some of these various factors correlated positively with their impact on disease burdens.

The work of [12] discusses using risk factors from various categories, such as epidemiology, radiology, and biomarkers, to target the population segment that will benefit the most from the newly introduced screening modality. Screening for lung cancer with low-dose computed tomography (LDCT) has been added to the arsenal of diagnostic tools available to people at high risk of developing the disease. While many pulmonary nodules are discovered, only a small percentage are early lung cancer. The vast majority of them are benign lesions of various types. Although the diagnostic work-up is time-consuming, the undeniable benefit stems from (I) lung cancer diagnosis at an earlier stage (stage shift); and (II) additional findings allowing the implementation of a preventive action that is not limited to thoracic oncology.

In [13], the authors proposed a model to predict the incidence of Colorectal Cancer (CRC) risk. The Clinical Cancer Research Nutrition database was used to drive and validate a model to predict CRC risk based on age and extended healthy lifestyle index components. The Soft-Voting classifier based on CatBoost, LightGBM, and Gradient-Boosting models provided an increased performance with an average accuracy of  $0.6583 \pm 0.054$ .

Data now drives more decisions than ever before. Data-based decisions are crucial for governmental and non-governmental organizations working in many fields. [14]. It reveals the hidden knowledge in their data. The health sector necessitates data-driven judgments [15]. As a result, the primary goal of this study is to use lung cancer patient's medical records and information from healthy individuals who were tested for lung cancer as a control to make data-driven decisions about which lung cancer risk factor is particularly relevant in the study area. This study uses a decision tree algorithm to rank the risk factors from the hospital's medical record. XGBoost machine learning is used to build a model that predicts the severity level of lung cancer. Finally, this study provides answers to the following questions:

1. Which risk factor is responsible for most lung cancer cases in the study area?
2. How can the level of lung cancer severity be detected using a machine learning model?

The entire work of this study is organized as follows: Section 2 covers the materials and methods used to achieve the study's objective. Section 3 is about experiments and analyzing the results. Finally, Section 4 discusses the conclusion and future direction of this research.

## 2. Materials and Methods

The process of lung cancer risk factor analysis and a cancer severity detection model includes data collection, model evaluation, and model validation using various evaluation metrics. The high-level description of the proposed lung cancer severity detection model is shown in Fig 1. The architecture includes components such as a cancer patient's demographic, medical history, and habits dataset; preprocessing components such as missing value filling, feature relevance calculation and selection; model training; and evaluation components.

The following is a description of each component of the proposed method.

### 2.1. Ethical Statements Approval

The study was approved by the Jimma University Institute of Health's institutional review board, and we obtained permission from the Tikur Ambesa (Black Lion) Hospital administration and unit heads. Participants were told about the study's aim, participation benefits, and their rights to stop at any time. We did not include the participant's name or other personal information on the data collection sheets and reports.

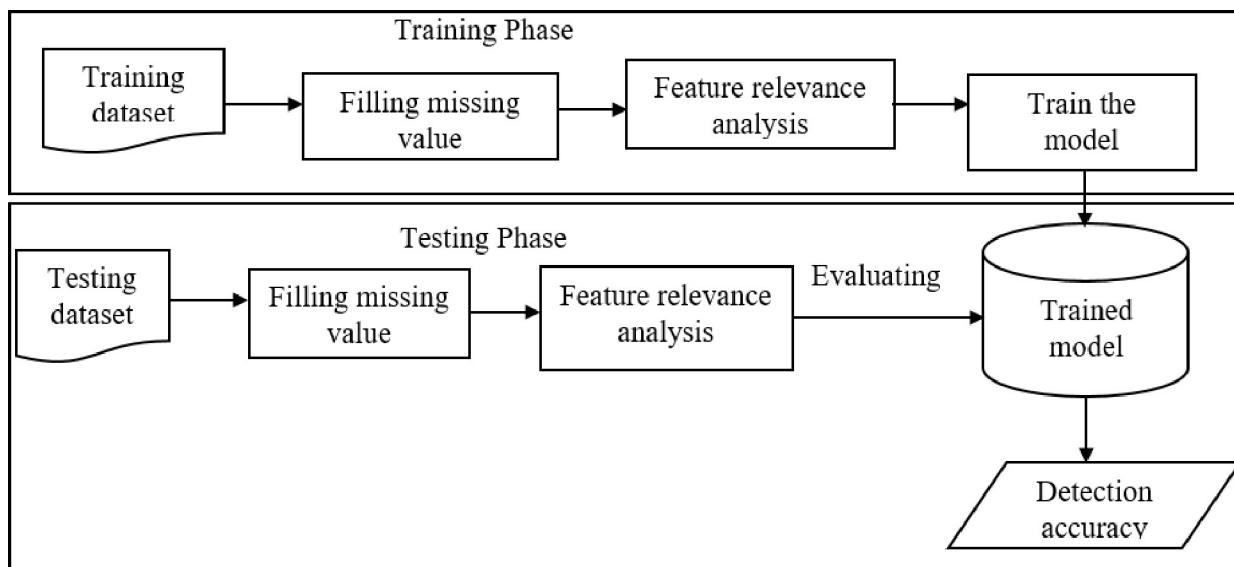

**Fig 1. The architecture of the proposed cancer severity detection model.**

<https://doi.org/10.1371/journal.pdig.0000308.g001>

## 2.2. Dataset Description

The data used for this study was compiled from patients' medical records at Tikur Ambesa Hospital in Addis Abeba, Ethiopia. The medical record is a document that contains the following information: (1) the medical history, (2) the findings from the PE, (3) laboratory test reports, (4) the findings and conclusions from special examinations, (5) the findings and diagnoses of consultants, (6) the diagnoses of the responsible physician, (7) notes on treatment, including medication, surgical operations, radiation, and physical therapy, and (8) progress notes by physicians, nurses, and others [16].

This study includes medical records, including demographic information, habits, and medical histories of 1000 lung cancer patients with different severity levels and 465 healthy individuals who were checked for lung cancer. The quality and quantity of data found in their medical records are used to select participants for the study. There are 15 significant risk factors in the hospital setting; however, medical professionals classify 11 of the 15 as highly likely to be major risk factors for lung cancer. The severity of lung cancer is categorized into three levels, namely low, medium, and high, depending on the stage of the disease in the patient [17]. The risk factors were obtained from the medical records of the hospital. The data set contains the medical records of 872 women and 593 men. Participants in the study range in age from 14 to 73 years old. The total number of people in each of the four groups is shown in Table 1 below.

We used numeric codes to represent the values of individual risk factors obtained from medical records [218]. The lung cancer severity level is the dependent variable in our detection

**Table 1. The number of patients under each category of lung cancer severities.**

| Lung cancer severity category | Number of individuals in each category |
|-------------------------------|----------------------------------------|
| Low                           | 303                                    |
| Moderate(middle)              | 332                                    |
| High                          | 365                                    |
| Healthy                       | 465                                    |

<https://doi.org/10.1371/journal.pdig.0000308.t001>

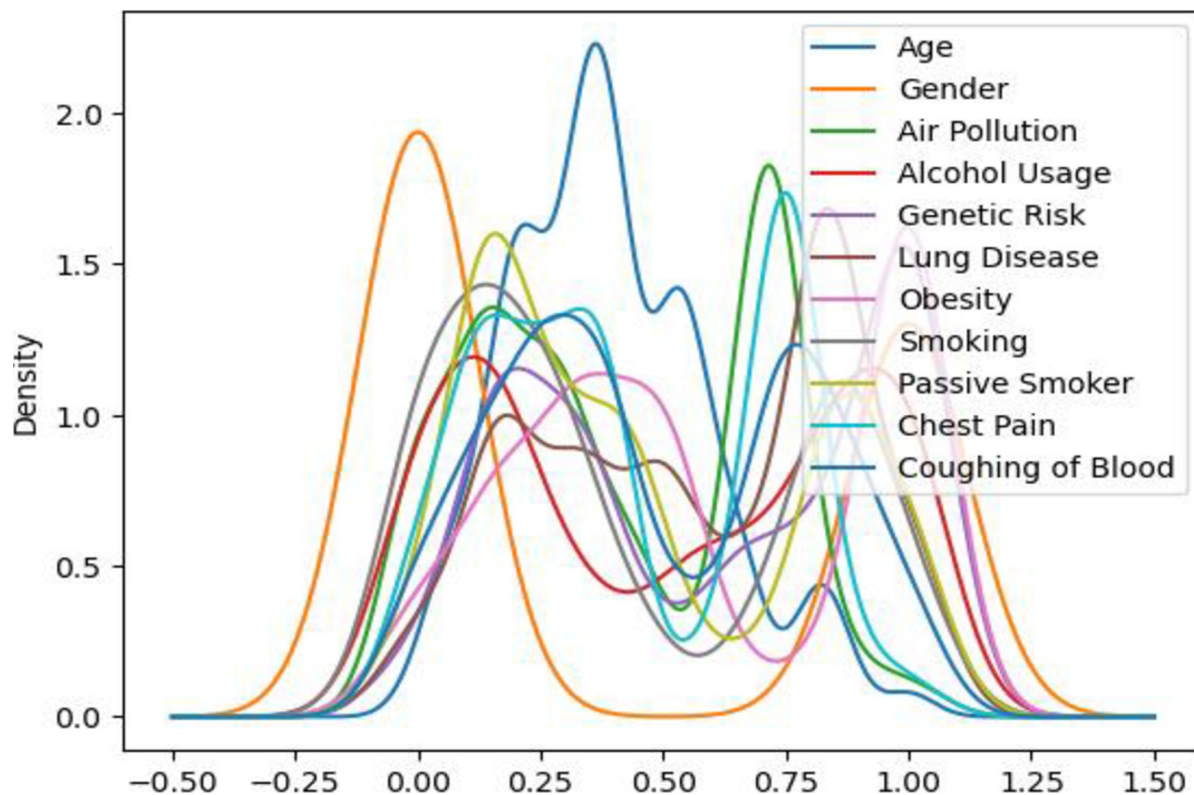

Fig 2. Distribution of values of each attribute in the dataset.

<https://doi.org/10.1371/journal.pdig.0000308.g002>

model and is determined by the degree of each risk factor. Fig 2 below depicts the normalized value distribution for each risk factor for lung cancer.

These characteristics are the risk factors that cause lung cancer with varying degrees of severity in Ethiopia. The study's target or dependent variable is the lung cancer severity level (low, medium, high, and healthy). To process the data using any learning model, we convert the lung cancer severity levels to integers, converting low to 0, medium to 1, and high to 2. Three is the level we assign to healthy people. All of the learning models used in this study use those severity levels as a classification or prediction variable.

### 2.3. Filling Missing Values

The information collected in this research was cleansed and reviewed for outliers, mistakes, and missing. Missing data is a common issue in almost every real-world dataset. Missing values are defined as information about variables that are missing. The problem with missing values is that the analyses cannot be made correct based on the data, and the conclusions drawn from a dataset with missing values may be false [19]. The risk factors considered in this study are depicted in Table 2 below, along with the number of missed values for each risk factor (column).

As shown in Table 2, we discovered a missing value in less than 4% of the records, so those rows with missing values can be removed [19]. Since eliminating reduces the quantity of the data, we used an imputation approach that takes a better evaluation of the data's central tendency into consideration. We use the mode of each attribute value to fill in the missing values in the dataset [20]. We used mode to fill in the missing values in the dataset because all of the

**Table 2. The number of missing values in each risk factor.**

| Risk factors      | Missing rows under each risk factor |
|-------------------|-------------------------------------|
| Age               | 0                                   |
| Gender            | 0                                   |
| Passive smoking   | 3                                   |
| Smoking           | 6                                   |
| Chest pain        | 12                                  |
| Air pollution     | 4                                   |
| Genetic risk      | 8                                   |
| Alcohol usage     | 14                                  |
| Obesity           | 6                                   |
| Lung diseases     | 2                                   |
| Coughing of blood | 0                                   |
| Total: 55 (3.75%) |                                     |

<https://doi.org/10.1371/journal.pdig.0000308.t002>

attributes in our dataset are categorical. Using mode values to impute missing data applies to numerical and categorical data [21]. We checked the mean and median of the values of each attribute before and after the change, and their difference was insignificant.

## 2.4. Feature Selection

Selecting a small subset of relevant features from the original features by removing irrelevant, redundant, or noisy features is known as feature selection [22]. Not all attributes or features are equally important for classification or detection problems. However, feature selection usually leads to better learning accuracy, lower computational cost, and better model interpretability. Before calculating the relationship between each attribute, we compute their skew values. Table 3 shows the outcome of the skewness value of each risk factor.

The following is a rule of thumb for determining the distribution of data based on the skew value [23]:

- ✓ The distribution is highly skewed if the skewness is less than -1 or greater than 1.
- ✓ The distribution is moderately skewed if the skewness is between -1 and -0.5 or between 0.5 and 1.
- ✓ The distribution is approximately symmetric if the skewness is between -0.5 and 0.5.

**Table 3. Skew values for each lung cancer risk factor.**

| Risk factor       | Skew value |
|-------------------|------------|
| Age               | 0.55       |
| Gender            | 0.40       |
| Air pollution     | 0.13       |
| Alcohol Usage     | -0.02      |
| Genetic Risk      | -0.13      |
| Lung Disease      | -0.22      |
| Obesity           | 0.03       |
| Smoking           | 0.38       |
| Passive Smoker    | 0.40       |
| Chest Pain        | 0.16       |
| Coughing of Blood | 0.12       |

<https://doi.org/10.1371/journal.pdig.0000308.t003>

According to the rule of thumb, only age has a moderate skew value; the others are classified as proximally symmetric. As a result, we use a correlation coefficient to determine the relationship between lung cancer risk factors.

Correlation coefficients measure the strength of the relationship between two variables [24]. The correlation coefficient can be expressed in terms of means and expectations:

$$\text{Corr}(f_i, t) = E \frac{(f_i - \text{mean}(f_i))(t - \text{mean}(t))}{(\sigma f_i)(\sigma t)} \quad (1)$$

Where  $f_i$  is feature  $i$ ,  $E$  is the expectation,  $t$  is the target variable,  $\sigma f_i$  is the standard deviation of  $f_i$ , and  $\sigma t$  is the standard deviation of the target variable  $t$ . Fig 3 depicts the correlation between each risk factor investigated in this study. As a result, we evaluated the significance of the attributes listed in Table 2 above. We chose only those with a higher correlation coefficient with the target attribute or lung cancer severity level. The heat map in Fig 3 below substitutes numbers with colors of varied shades, as indicated by the scale on the right. Lighter cells have a higher correlation value. Looking at the relationship between the dependent variable (severity level) and the other independent variables, we can see that alcohol use, genetic risk, obesity, passive smoking, and blood coughing have the strongest positive correlation, while age and gender do not.

The correlation coefficient between -0.2 and 0.2 indicates that the two have an insignificant level of dependence in both positive and negative directions [25]. Depending on this, removing

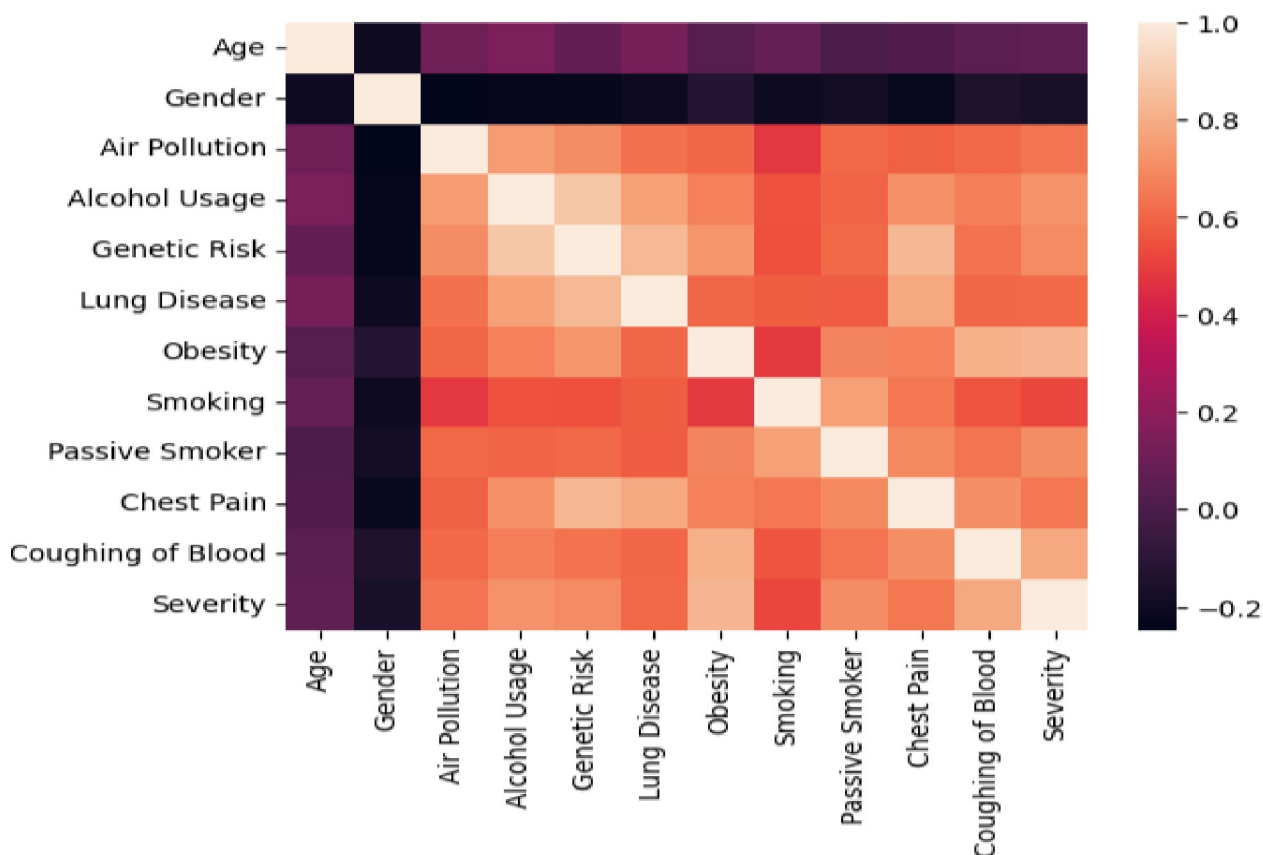

Fig 3. Correlation between each risk factor, including the dependent variable.

<https://doi.org/10.1371/journal.pdig.0000308.g003>

attributes with correlation coefficients between 0.2 and -0.2 does not affect a given learning model's classification or predictive performance. As a result, when determining the severity level of lung cancer based on the above risk factors, we did not take a patient's age or gender into account.

## 2.5. Train-test splitting

The train-test split module is used to estimate the performance of the proposed learning algorithm. It involves dividing the dataset into two subsets. The first subset is used to fit the model, and the second subset is supplied to the model after the prediction has been made and the result has been compared to the expected value. There is no globally accepted splitting ratio in machine learning [26]. However, Train: 80%, Test:20% is the most commonly used splitting percentage [27]. Therefore, we used an 80/20 train-test split ratio throughout the experiments. That means 80% of the data set is used to train the model, and 20% is used to test the trained model.

## 2.6. Learning Models

**2.6.1. Extreme Gradient Boosting.** In this section, we will discuss the machine-learning methods that we used in our cancer severity detection system. The XGBoost classifier was chosen for our proposed cancer severity detection. XGBoost is a decision-tree-based ensemble machine learning algorithm that uses a gradient boosting algorithm before classifying a known dataset [28]. The two motivating factors that led us to choose XGBoost are model performance and execution speed. XGBoost is extremely fast when compared to other gradient-boosting implementations [29]. The mathematical explanation for XGBoost is provided below. XGBoost is made up of several Classification and Regression Trees (CART). According to CART, a basic decision tree can be established using the concept of entropy. CART's target is the Gini coefficient [30]:

$$Obj : minGini(D, a) = \sum_{v=0}^V \frac{|D^v|}{|D|} Gini(D^v),$$

$$Gini(D) = 1 - \sum_{k=1}^K (P_k)^2 \quad (2)$$

where  $a$  is one of the attributes we chose,  $V$  is the scale of  $a$ ,  $v$  is one of the values of  $a$ ,  $D$  is the dataset,  $P$  stands for the probability, and  $K$  is the label scale. Intuitively, the Gini coefficient reflects the likelihood that two samples in the dataset have different labels. Furthermore, this is the principle for building a single tree. The goal of XGBoost is to reduce the residual. The residual is the difference between the actual and predicted values.

**2.6.2. K-Nearest Neighbors (KNN).** KNN is a supervised machine-learning method commonly used for classification and regression applications. It is a non-parametric algorithm, which means it makes no assumptions about the data's underlying distribution. The KNN algorithm begins by memorizing the full training dataset. When a new data point is submitted for classification or regression, the algorithm searches the training dataset for the  $K$  nearest neighbors based on some distance measure, where  $K$  is a user-defined value. The Euclidean distance is the most commonly used distance metric, but other distance metrics can also be utilized [31].

**2.6.3. Support Vector Machine.** Support Vector Machine (SVM) is a supervised machine learning technique for classification and regression problems. A linear classifier seeks the hyperplane that best separates the input points into their respective classes. The SVM

algorithm finds the hyperplane that maximizes the margin between the two nearest data points from distinct classes referred to as support vectors. The mathematical formulation of the SVM algorithm is as follows: Given an  $n$ -point training dataset  $D$ , the SVM method attempts to locate the hyperplane  $w^T x + b = 0$ , which splits the data points into their respective classes. In this case,  $w$  is a weight vector, and  $b$  is a bias term. The hyperplane can be expressed as follows [32]:

$$w^T x_i + b \geq 1, \text{ if } y_i = 1 \text{ or } w^T x_i + b \leq -1, \text{ if } y_i = -1 \quad (3)$$

The SVM algorithm aims to maximize the margin while minimizing the classification error.

**2.6.4. Multilayer Perceptron.** The Multilayer Perceptron (MLP) is an artificial neural network often used for supervised learning tasks such as classification and regression. It comprises numerous layers of interconnected neurons, where each neuron is a processing unit that receives input from the previous layer and outputs it to the next layer [33].

An MLP architecture typically consists of an input layer, one or more hidden layers, and an output layer. The input layer receives input data, which is subsequently processed by the hidden layers to form the network's output. The output layer generates the network's final output, a class label for classification tasks, or a numerical value for regression tasks. The MLP's mathematical formulation is: Let  $X$  be the input data matrix of dimension  $n \times p$ , where  $n$  is the number of data points, and  $p$  is the number of input features. Let  $Y$  be the output data matrix of dimension  $n \times q$ , where  $q$  is the number of output classes or values. Let  $W$  be the size  $p \times m$  weight matrix, where  $m$  is the number of neurons in the first hidden layer. Let  $V$  be the dimension  $m \times q$  weight matrix, where  $q$  is the number of output classes or values. Let  $b_1$  be the size  $m \times 1$  bias vector for the first hidden layer. Let  $b_2$  be the output layer's bias vector of size  $q \times 1$ . The output of the first hidden layer is  $Z = f(XW + b_1)$  [34].

Where  $f$  is the activation function, typically a nonlinear function such as the sigmoid or hyperbolic tangent function. The output of the output layer can be computed as  $\hat{Y} = \text{softmax}(ZV + b_2)$ , where  $\text{softmax}$  is a function used to convert the network output into a probability distribution over the output classes.

## 2.7. Evaluation Metrics

The models used to analyze the risk factors that cause cancer in Ethiopia can be measured in terms of detection accuracy, precision, recall, support, and confidence [35]. The following are the performance measures used in this study:

**Accuracy:** It may be defined as the number of correct predictions made as a ratio of all predictions made. We can easily calculate it using the confusion matrix and the following formula:

$$Accuracy = \frac{TP + TN}{TP + FP + FN + TN} \quad (4)$$

**Precision:** The proportion of correct positive predictions to total positive predictions. It is also known as positive predictive value.

$$Precision = \frac{TP}{TP + FP} \quad (5)$$

**Recall:** The proportion of correctly classified positive samples to total positive samples is represented by a recall. Similarly, specificity is defined as the proportion of correctly classified

negative samples compared to total negative samples.

$$Recall = \frac{TP}{TP + FN} \quad (6)$$

Where True Positives (TP): It is the case when the data point's actual and predicted class are 1. True Negatives (TN): It is the case when both the actual and predicted class of the data point are 0. False Positives (FP): It is the case when the actual class of data point is zero, and the predicted class of data point is 1. False Negatives (FN): It is the case when an actual class of data point is one, and the predicted class of data point is zero [36].

### 3. Experimental results and discussion

The experiment's main goal was to detect the severity level of cancer disease from the risk factors that cause cancer. All of the experiments in this study were carried out on a computer with 16 GB of RAM, a Core i5, and the Windows 10 operating system. The source code for reading files, modeling, and presenting results was written in Python, and the hyperparameters of the machine learning algorithms used in this study were tuned using the grid search tuning strategy.

#### 3.1. Risk factors analysis

Let us compute and identify the most influential risk factor for cancer in Ethiopia before developing a cancer severity detection model. The significance of features for cancer severity level is calculated using split points that improve the performance of the cancer severity detection measure and is weighted by the number of observations handled by the node [37]. The feature importance is built using the decision tree's nodes and the features used to build the tree. Each node is assigned a split point on a given feature with an appropriate split criterion value. These values will be used to compute weight using the following formula [38]:

$$J(X_j) = \sum_{n \in Q_j} split(n) \quad (7)$$

where  $Q_j$  denotes the set of nodes whose split point uses feature  $j$  and  $split(n)$  denote the value of the given split criterion for node  $n$  (depending on tree type). It should be noted that features that are not used in the tree are not included in the ranking and, as a result, have a weight of 0. The feature relevance is computed by a decision tree that uses the Gini splitting criterion. Gini impurity is one of the most popular and commonly used techniques that measure the impurity of the nodes and is calculated as [39]:

$$gini\ impurity = 1 - Gini \quad (8)$$

Considering that there are  $n$  classes, here is the sum of squares of success probabilities of each class and is given as:

$$Gini = (P_{c_1}^2 + P_{c_2}^2 + P_{c_3}^2 + P_{c_n}^2) \quad (9)$$

Then, the importance of each cancer risk factor in detecting cancer severity in the study area is depicted in Fig 4.

According to the results shown in Fig 4, the Coughing of blood is the leading risk factor of lung cancer because it is more relevant for detecting severity with a weight of 0.39. A feature importance of 0.39 indicates that the feature contributes 39% of the overall decision in the detection model. Furthermore, air pollution and obesity are the most important risk factors for lung cancer, with relevance weights of 0.21 and 0.14, respectively. This implies that these risk factors are causing or indicating most lung cancer cases in the study area. These three

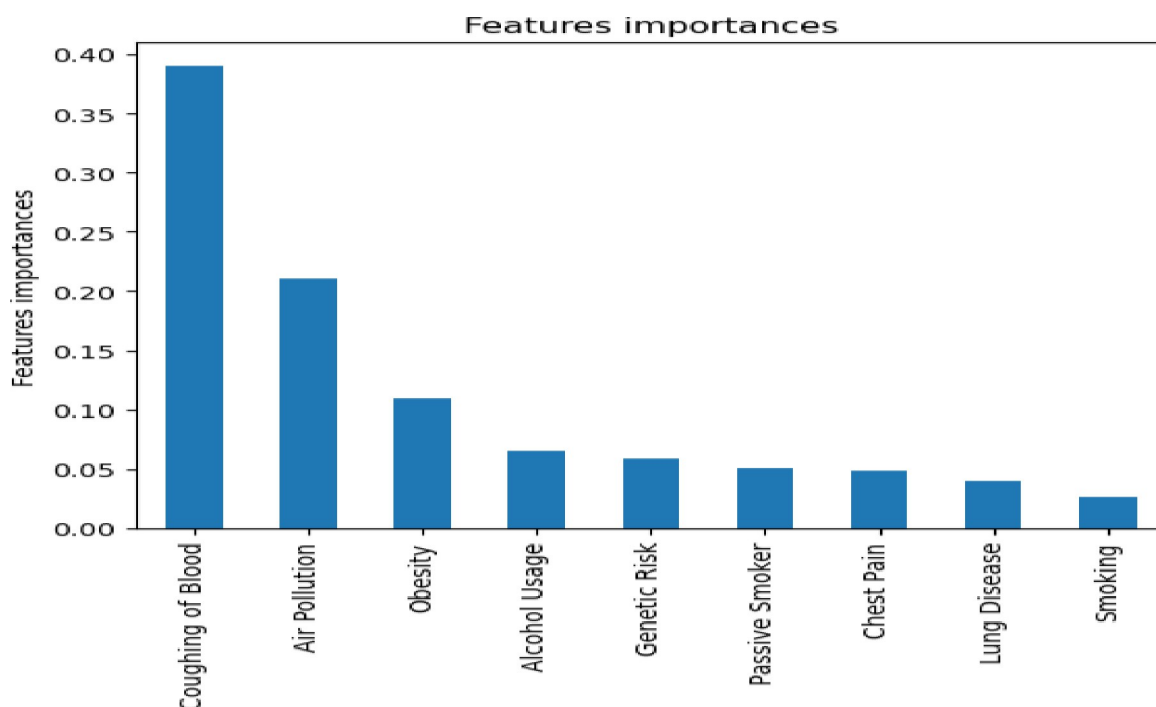

Fig 4. The importance of each lung cancer risk factor.

<https://doi.org/10.1371/journal.pdig.0000308.g004>

factors (blood coughing, air pollution, and obesity) account for 74% of lung cancer analysis decisions in the study area.

### 3.2. Cancer severity detection model

The lung cancer severity detection model is created using an XGBoost classifier with an 80 percent data size for training and a 20 percent data size for testing the detection accuracy of the developed detection model. The model took nine attribute values as training and testing data and severity levels as training and testing labels. Fig 5 depicts the predicted and actual cancer severity levels and the overlap between the predicted and actual lung cancer severity levels. This means the proposed model correctly predicted the level for each testing instance.

Furthermore, the proposed cancer severity predictive model developed with the XGBoost algorithm is evaluated using various quality metrics such as accuracy, recall, precision, and confusion matrices. Table 4 shows the model's accuracy, precision, and recall, and the results show that the proposed machine learning model detects the severity level of lung cancer by using nine demographics, habits, and medical histories of lung cancer patients and healthy individuals in Ethiopia.

Fig 6 depicts the confusion matrix for the proposed lung cancer severity detection model's three severity levels, namely 0, 1, 2, and 3. We tested the model's performance on 293 instances and correctly predicted 290. However, it predicted only three instances classified as "low-severity lung cancer" by doctors, and the model classified them as "healthy."

Furthermore, we compare the proposed cancer severity level prediction model to machine learning models such as KNN, SVM, and MLP. The same dataset (our dataset) is used for comparison. When we ran learning models repeatedly, the outcomes varied [40]. However, by running the models ten times, we got the average values of each evaluation measure outcome.

Table 5 compares each learning model in terms of the three quality measures. Regarding the three evaluation criteria, XGBoost outperforms KNN, SVM, and MLP.

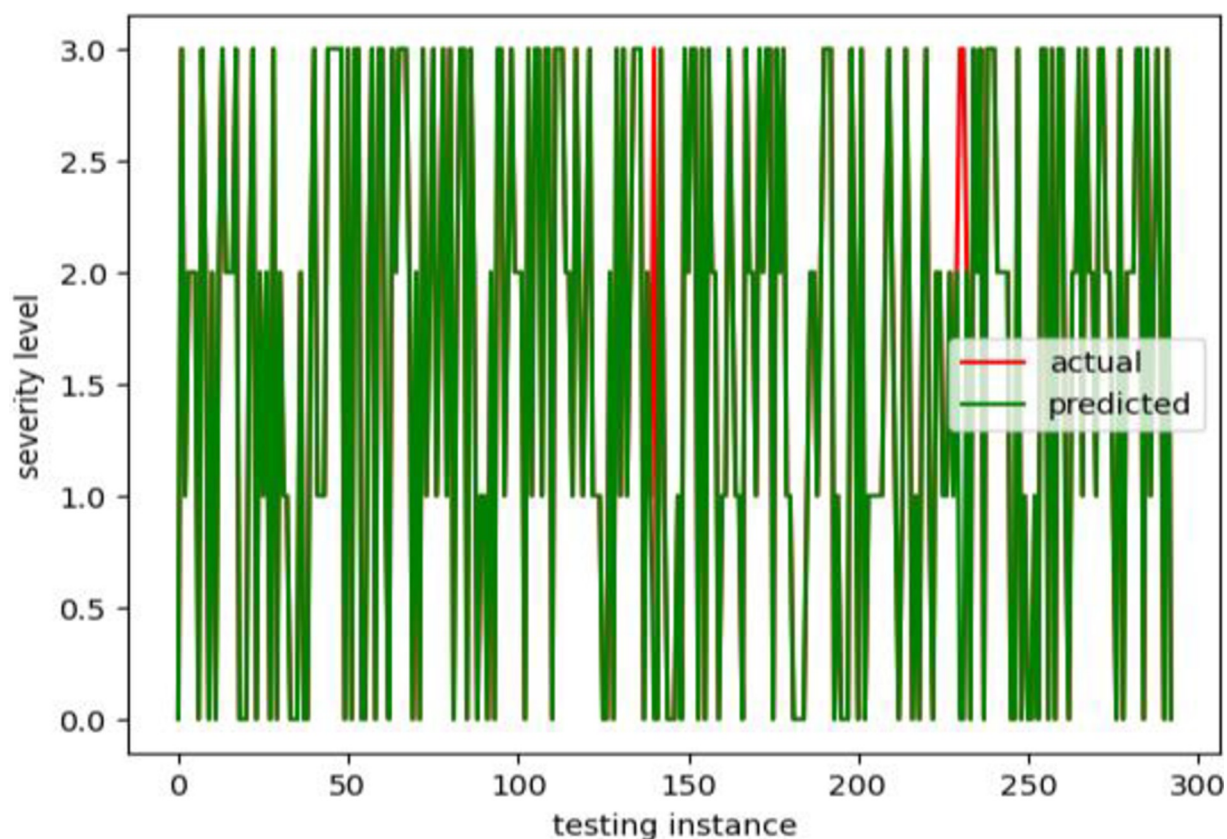

**Fig 5.** The actual and predicted cancer severity level for testing data.

<https://doi.org/10.1371/journal.pdig.0000308.g005>

The number of instances incorrectly classified by each learning model is shown in [Table 6](#) below. The table shows the number of incorrect classifications from the testing set out of 293 data instances (patients).

According to the results in [Table 6](#), the XGBoost classifier outperforms the other machine-learning algorithm by lowering the percentage of errors to 1%. As a result, the XGBoost classifier is chosen to create a lung cancer severity detection model for the research domain. The proposed model gives better results regarding the quality of the metrics used to evaluate its performance. Due to a data shortage, this study focused primarily on identifying the major lung cancer risk factor using a decision tree and developing a predictive model of lung cancer severity levels. However, in the future, we plan to expand it to include cancer classification and analysis of major risk factors for each type of cancer.

## 4. Conclusion

In this paper, we analyzed lung cancer risk factors and proposed a new lung cancer severity level predictive model. The data for this study came from Tikur Ambesa Hospital's medical

**Table 4.** Evaluation of the proposed lung cancer severity detection model.

| Model              | Evaluation metrics |           |        |
|--------------------|--------------------|-----------|--------|
|                    | Accuracy           | Precision | Recall |
| XGBoost classifier | 98.9%              | 99%       | 98.9%  |

<https://doi.org/10.1371/journal.pdig.0000308.t004>

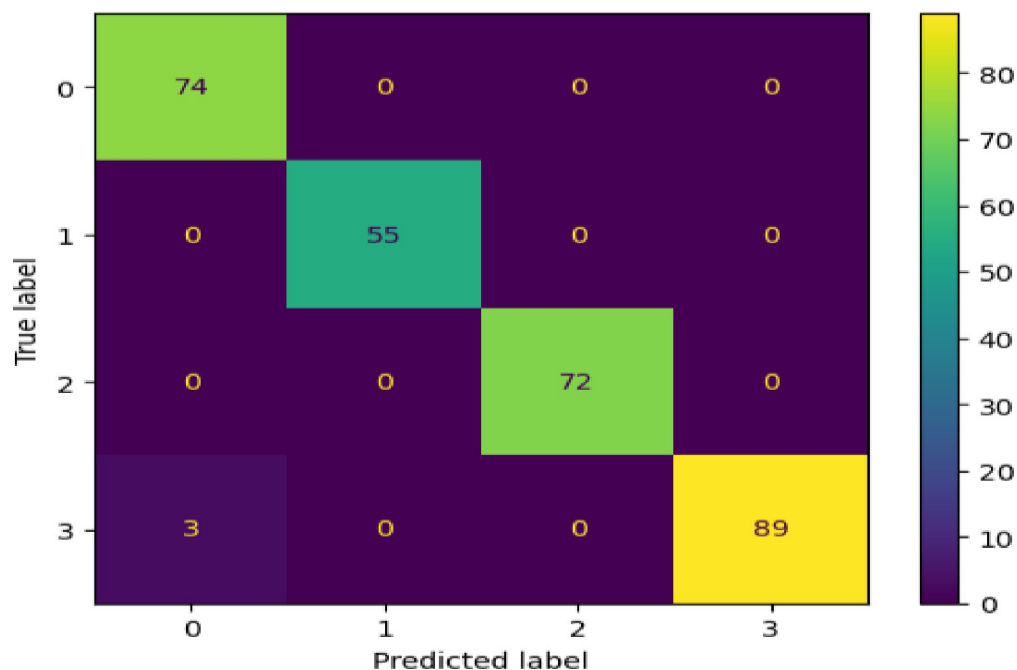

Fig 6. Confusion matrix produced by trained model.

<https://doi.org/10.1371/journal.pdig.0000308.g006>

Table 5. Comparison of XGBoost, MLP, KNN, and SVM with various evaluation metrics.

| Learning Model | Performance |           |        |
|----------------|-------------|-----------|--------|
|                | Accuracy    | Precision | Recall |
| XGBoost        | 98.9%       | 99%       | 98.9%  |
| MLP            | 93%         | 93.5%     | 93%    |
| KNN            | 89%         | 90%       | 89%    |
| SVM            | 90.4%       | 90.5%     | 90.4%  |

<https://doi.org/10.1371/journal.pdig.0000308.t005>

Table 6. Number of incorrectly classified instances by each learning model.

| Learning model | Number of instances misclassified by models |
|----------------|---------------------------------------------|
| XGBoost        | 3                                           |
| MLP            | 20                                          |
| KNN            | 32                                          |
| SVM            | 28                                          |

<https://doi.org/10.1371/journal.pdig.0000308.t006>

records repository, which included lung cancer patients and 465 healthy people who were tested for lung cancer as a control. We used a decision tree-based feature weighing strategy to determine which risk factor is dominant in the study area and the XGBoost machine learning algorithm to build a model to detect the severity level of lung cancer patients at the hospital. The results of the experiments suggest that dust allergies, obesity, fatigue, alcohol use, and passive smoking are the most prevalent risk factors in the study area. In addition, the proposed cancer severity level detection model produces an acceptable result with higher detection accuracy. Therefore, the findings of this study deserve to be used in different applications that use the severity level of cancer or in making health policies related to cancer. The study will be

expanded with more data in the future, and it will be one component of a system that notifies the severity level of lung cancer based on risk factors.

## Acknowledgments

The authors would like to sincerely thank Dr. Dagmawi Solomon for his assistance in obtaining the dataset used in this study. In addition, we thank Jimma University for its support with various resources.

## Author Contributions

**Conceptualization:** Demeke Endalie.

**Data curation:** Wondmagegn Taye Abebe.

**Formal analysis:** Demeke Endalie.

**Methodology:** Demeke Endalie, Wondmagegn Taye Abebe.

**Resources:** Demeke Endalie.

**Software:** Demeke Endalie.

**Supervision:** Demeke Endalie.

**Validation:** Demeke Endalie.

**Visualization:** Demeke Endalie.

**Writing – original draft:** Demeke Endalie.

**Writing – review & editing:** Wondmagegn Taye Abebe.

## References

1. Anand P, Kunnumakkara AB, Sundaram C, Harikumar KB, Tharakan ST, Lai OS, et al. Cancer is a Preventable Disease that Requires Major Lifestyle Changes. *Pharm Res* [Internet]. 2008; 25(9):2200–2200. Available from: <https://doi.org/10.1007/s11095-008-9661-9> PMID: 18626751
2. Chimed-Ochir O, Delgermaa V, Takahashi K, Purev O, Sarankhuu A, Fujino Y, et al. Mongolia health situation: based on the Global Burden of Disease Study 2019. *BMC Public Health* [Internet]. 2022; 22(1):5. Available from: <https://doi.org/10.1186/s12889-021-12070-3> PMID: 34983445
3. Kibret YM, Leka YA, Tekle NF, Tigeneh W. Patterns of cancer in Wolaita Sodo University hospital: South Ethiopia. *PLoS One* [Internet]. 2022; 17(10): e0274792. Available from: <https://doi.org/10.1371/journal.pone.0274792> PMID: 36201527
4. Feuchtnner J, Mathewos A, Solomon A, Timotewos G, Aynalem A, Wondemagegnehu T, et al. Addis Ababa population-based pattern of cancer therapy, Ethiopia. *PLoS One* [Internet]. 2019; 14(9): e0219519. Available from: <https://doi.org/10.1371/journal.pone.0219519> PMID: 31536505
5. Solomon S, Mulugeta W. Diagnosis and risk factors of advantage cancers in Ethiopia. *J Cancer Prev* [Internet]. 2019; 24(3):163–72. Available from: <https://doi.org/10.15430/JCP.2019.24.3.163> PMID: 31624722
6. Hailu Tesfaye A, Gebrehiwot M, Aragaw FM, Dessie A. Prevalence and risk factors of chronic respiratory symptoms in public and private school teachers in north-western Ethiopia: results from a multicentre cross-sectional study. *BMJ Open* [Internet]. 2023; 13(4): e069159. Available from: <https://doi.org/10.1136/bmjopen-2022-069159> PMID: 37045568
7. Espina C, Soerjomataram I, Forman D, Martín-Moreno JM. Cancer prevention policy in the EU: Best practices are now well recognized; no reason for countries to lag behind. *J Cancer Policy* [Internet]. 2018; 18:40–51. Available from: <http://dx.doi.org/10.1016/j.jcpo.2018.09.001>.
8. Tekeste Z, Berhe N, Arage M, Degarege A, Melaku Y, Reynolds A. Cancer signs and risk factors awareness in Addis Ababa, Ethiopia: a population-based survey. *Infect Agent Cancer* [Internet]. 2023; 18(1):1. Available from: <https://doi.org/10.1186/s13027-022-00477-5> PMID: 36600261

9. Dehdar S, Salimifard K, Mohammadi R, Marzban M, Saadatmand S, Fararouei M, et al. Applications of different machine learning approaches in prediction of breast cancer diagnosis delay. *Front Oncol* [Internet]. 2023; 13:1103369. Available from: <https://doi.org/10.3389/fonc.2023.1103369> PMID: 36874113
10. Alaa H, Shah SA. Perception of cancer risk and its associated risk factors among young Iraqis living in Baghdad. *Asian Pac J Cancer Prev* [Internet]. 2019; 20(8):2339–43. Available from: <https://doi.org/10.31557/APJCP.2019.20.8.2339> PMID: 31450904
11. Pallari E, Lewison G. Cardiovascular and cancer risk factors analysis for 2001–2020 from the global research output and European newspapers. *Scientometrics* [Internet]. 2022; 127(9):5159–74. Available from: <http://dx.doi.org/10.1007/s11192-022-04465-9>.
12. Adamek M, Wachuła E, Szablowska-Siwik S, Boratyn-Nowicka A, Czyżewski D. Risk factors assessment and risk prediction models in lung cancer screening candidates. *Ann Transl Med* [Internet]. 2016; 4(8):151. Available from: <https://doi.org/10.21037/atm.2016.04.03> PMID: 27195269
13. Qarmiche N, Chrifi Alaoui M, El Kinany K, El Rhazi K, Chaoui N. Soft-Voting colorectal cancer risk prediction based on EHLI components. *Inform Med Unlocked* [Internet]. 2022; 33(101070):101070. Available from: <http://dx.doi.org/10.1016/j.imu.2022.101070>.
14. Fanelli S, Pratici L, Salvatore FP, Donelli CC, Zangrandi A. Big data analysis for decision-making processes: challenges and opportunities for the management of health-care organizations. *Manag Res Rev* [Internet]. 2022; Available from: <http://dx.doi.org/10.1108/mrr-09-2021-0648>.
15. Tilahun B, Teklu A, Mancuso A, Endehabtu BF, Gashu KD, Mekonnen ZA. Using health data for decision-making at each level of the health system to achieve universal health coverage in Ethiopia: the case of an immunization programme in a low-resource setting. *Health Res Policy Syst* [Internet]. 2021; 19(Suppl 2):48. Available from: <https://doi.org/10.1186/s12961-021-00694-1> PMID: 34380496
16. Richard F, Leblond DD, Brown M, Suneja JF. *History Taking and the Medical Record*. New York, NY: McGraw-Hill Education; 2015.
17. Casal-Mouriño A, Ruano-Ravina A, Lorenzo-González M, Rodríguez-Martínez Á, Giraldo-Orsorio A, Varela-Lema L, et al. Epidemiology of stage III lung cancer: frequency, diagnostic characteristics, and survival. *Transl Lung Cancer Res* [Internet]. 2021; 10(1):506–18. Available from: <https://doi.org/10.21037/tlcr.2020.03.40> PMID: 33569332
18. Przybyła P, Brockmeier AJ, Ananiadou S. Quantifying risk factors in medical reports with a context-aware linear model. *J Am Med Inform Assoc* [Internet]. 2019; 26(6):537–46. Available from: <https://doi.org/10.1093/jamia/ocz004> PMID: 30840055
19. Kang H. The prevention and handling of the missing data. *Korean J Anesthesiol* [Internet]. 2013; 64(5):402–6. Available from: <https://doi.org/10.4097/kjae.2013.64.5.402> PMID: 23741561
20. Das D, Nayak M, Pani SK. Missing Value Imputation-A Review. *Int J Comput Sci Eng* [Internet]. 2019; 7(4):548–58. Available from: <http://dx.doi.org/10.26438/ijcse/v7i4.548558>.
21. Ribeiro C, Freitas AA. A data-driven missing value imputation approach for longitudinal datasets. *Artif Intell Rev* [Internet]. 2021; 54(8):6277–307. Available from: <http://dx.doi.org/10.1007/s10462-021-09963-5>.
22. Endalieu D, Haile G, Taye Abebe W. Feature selection by integrating document frequency with genetic algorithm for Amharic news document classification. *PeerJ Comput Sci* [Internet]. 2022; 8(e961):e961. Available from: <https://doi.org/10.7717/peerj-cs.961> PMID: 35634124
23. Mean Paul T., Median, and Skew: Correcting a Textbook Rule. *Journal of Statistics Education*. 2005; 13(2):1–13.
24. Schober P, Boer C, Schwarte LA. Correlation coefficients: Appropriate use and interpretation. *Anesth Analg* [Internet]. 2018; 126(5):1763–8. Available from: <https://doi.org/10.1213/ANE.0000000000002864> PMID: 29481436
25. Mukaka MM. Statistics corner: A guide to appropriate use of correlation coefficient in medical research. *Malawi Med J*. 2012; 24(3):69–71. PMID: 23638278
26. Tang C, Wang D, Tan A-H, Miao C. EEG-based emotion recognition via fast and robust feature smoothing. In: *Brain Informatics*. Cham: Springer International Publishing; 2017. p. 83–92.
27. Joseph VR. Optimal ratio for data splitting. *Stat Anal Data Min* [Internet]. 2022; 15(4):531–8. Available from: <https://doi.org/http%3A//dx.doi.org/10.1002/sam.11583>
28. Zhang P, Jia Y, Shang Y. Research and application of XGBoost in imbalanced data. *Int J Distrib Sens Netw* [Internet]. 2022; 18(6):155013292211069. Available from: <http://dx.doi.org/10.1177/15501329221106935>.
29. Ibrahim Ahmed Osman A, Najah Ahmed A, Chow MF, Feng Huang Y, El-Shafie A. Extreme gradient boosting (Xgboost) model to predict the groundwater levels in Selangor Malaysia. *Ain Shams Eng J* [Internet]. 2021; 12(2):1545–56. Available from: <http://dx.doi.org/10.1016/j.asej.2020.11.011>.

30. Wang X, Lu X. A host-based anomaly detection framework using XGBoost and LSTM for IoT devices. *Wirel Commun Mob Comput* [Internet]. 2020; 2020:1–13. Available from: <http://dx.doi.org/10.1155/2020/8838571>.
31. Trabassi D, Serrao M, Varrecchia T, Ranavolo A, Coppola G, De Icco R, et al. Machine learning approach to support the detection of Parkinson's disease in IMU-based gait analysis. *Sensors (Basel)* [Internet]. 2022; 22(10):3700. Available from: <https://doi.org/10.3390/s22103700> PMID: 35632109
32. Roushangar K, Ghasempour R. Kiyomars Roushangar, Roghayeh Ghasempour, Vols. i: *Classic Soft-Computing Techniques*. 2023;411–22.
33. Naskath J, Sivakamasundari G, Begum AAS. A study on different deep learning algorithms used in deep neural nets: MLP SOM and DBN. *Wirel Pers Commun* [Internet]. 2023; 128(4):2913–36. Available from: <https://doi.org/10.1007/s11277-022-10079-4> PMID: 36276226
34. Okechukwu D, Onukwuli JO, Ighalo C, Daniel Ezeliora PC. Chapter 8—ANN prognostication and GA optimization of municipal solid waste leachate treatment using aluminum electrodes via electrocoagulation-flocculation method. In: *Current Trends and Advances in Computer-Aided Intelligent Environmental Data Engineering*. Academic Press; 2022. p. 161–83.
35. Mahum R, Irtaza A, Nawaz M, Nazir T, Masood M, Mehmood A. A generic framework for Generation of Summarized Video Clips using Transfer Learning (SumVClip). In: 2021 Mohammad Ali Jinnah University International Conference on Computing (MAJICC). IEEE; 2021.
36. van Ravenzwaaij D, Ioannidis JPA. True and false positive rates for different criteria of evaluating statistical evidence from clinical trials. *BMC Med Res Methodol* [Internet]. 2019; 19(1):218. Available from: <https://doi.org/10.1186/s12874-019-0865-y> PMID: 31775644
37. Rengasamy D, Mase JM, Kumar A, Rothwell B, Torres MT, Alexander MR, et al. Feature importance in machine learning models: A fuzzy information fusion approach. *Neurocomputing* [Internet]. 2022; 511:163–74. Available from: <http://dx.doi.org/10.1016/j.neucom.2022.09.053>.
38. Zhou H, Zhang J, Zhou Y, Guo X, Ma Y. A feature selection algorithm of decision tree based on feature weight. *Expert Syst Appl* [Internet]. 2021; 164(113842):113842. Available from: <http://dx.doi.org/10.1016/j.eswa.2020.113842>.
39. Laber E, Murtinho L. Minimization of Gini impurity: NP-completeness and approximation algorithm via connections with the k-means problem. *Electron Notes Theor Comput Sci* [Internet]. 2019; 346:567–76. Available from: <http://dx.doi.org/10.1016/j.entcs.2019.08.050>.
40. Rafiqul I, Chowdhury JH. Risk prediction for repeated measures health outcomes: A divide and recombine framework. *Informatics in Medicine Unlocked*. 2022; 28.
